# Supplementary material for: Analysis of factors associated with the first lumpy skin disease outbreaks in naïve cattle herds in different regions of Thailand
Source: PubMed Central journal article supplement (PMC10921558; doi:10.3389/fvets.2024.1338713), 2024-02-22

Figure S1. Residual diagnostics for the final mixed-effect model, including QQ plot residuals and a plot between residuals and predicted values.

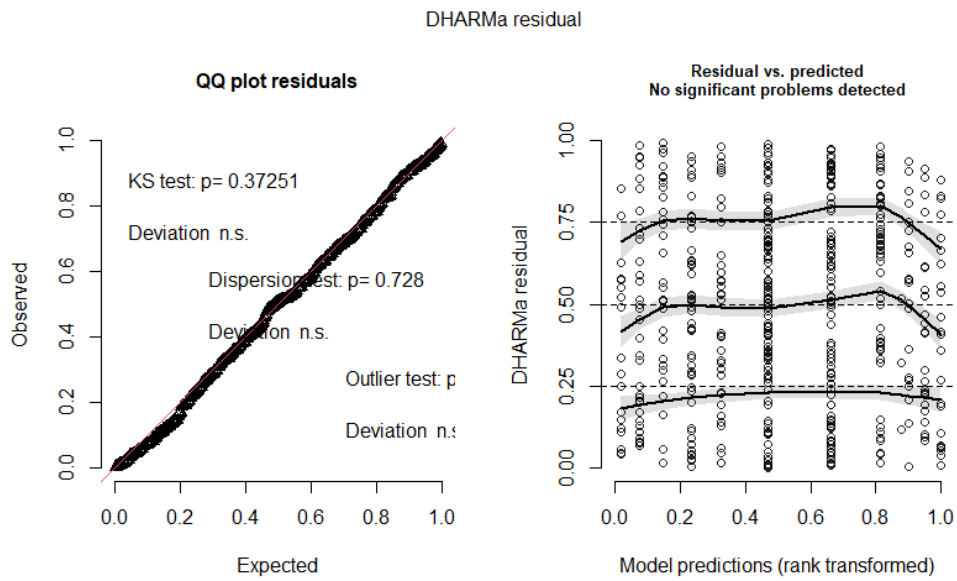

Supplement: Image_1.pdf [file Image_1.pdf]
